# Supplementary material for: Bovine C-X-C Motif Chemokine Ligand 14 Expression Is Regulated by Alternative Polyadenylation and MicroRNAs
Source: MDPI journal article supplement (doi:10.3390/ani13193075), 2023-09-30
Supplement: s1 [file s1]

**Table S3.** Primers used for real-time quantitative PCR

| Primer name | Sequence (5'-3')          |                           |
|-------------|---------------------------|---------------------------|
| bCXCL14     | F: ACTGCGAGGAGAAGATGGTT   | R: CTGTGAGAAAGAAAGGGTTTGT |
| mCyclinD1   | F: GCGTACCCTGACACCAATC    | R: CTCCTCTTCGCACTTCTG     |
| mCyclinE    | F: GCCTCGGAAAATCAGACCA    | R: CCATCAGCCAATCCAGAAGAAC |
| mCullin3    | F: CGGGATATTGGCCTACTCA    | R: GACCATAAAAGCTGGCATTG   |
| mGAPDH      | F: CGGGGTCCCAGCTTAGGTTC   | R: GCCCAATACGGCCAAATCCGT  |
| hGAPDH      | F: ACAACTTTGGTATCGTGGAAGG | R: GCCATCACGCCACAGTTTC    |

Note: b, bovine; m, mouse; h, human.
