# Supplementary material for: Bovine C-X-C Motif Chemokine Ligand 14 Expression Is Regulated by Alternative Polyadenylation and MicroRNAs
Source: MDPI journal article supplement (doi:10.3390/ani13193075), 2023-09-30
Supplement: s1 [file s1]

**Table S2.** List of miRNAs

| miRNAs name      | Sequence (5'-3')            |                               |
|------------------|-----------------------------|-------------------------------|
| miR-17-5p mimics | S: CAAAGUGCUUACAGUGCAGGUAGU | AS: UACCUGCACUGUAAGCACUUUGUU  |
| miR-150 mimics   | S: UCUCCCAACCCUUGUACCAGUGU  | AS: ACUGGUACAAGGGUUGGGAGAUU   |
| miR-217 mimics   | S: UACUGCAUCAGGAACUGAUUGGAU | AS: CCAAUCAGUUCCUGAUGCAGUAUUA |
| miR-671 mimics   | S: AGGAAGCCCUGGAGGGGCUGGAG  | AS: CCAGCCCCUCCAGGGCUUCCUUU   |
| miR-874 mimics   | S: CUGCCCUGGCCCAGGGACCGA    | AS: GGUCCCUCGGGCCAGGGCAGUU    |
| Negative control | S: UUCUCCGAACGUGUCACGUTT    | AS: ACGUGACACGUUCGGAGAATT     |

Note: S and A denote the sense chain and the anti-sense chain, respectively.
