# Supplementary material for: Bovine C-X-C Motif Chemokine Ligand 14 Expression Is Regulated by Alternative Polyadenylation and MicroRNAs
Source: MDPI journal article supplement (doi:10.3390/ani13193075), 2023-09-30
Supplement: s1 [file s1]

**Table S1.** Primers used for 3' RACE and Construction of recombinant vector

| Primer name               | Sequence (5'-3')                                                                             | Purpose                   |
|---------------------------|----------------------------------------------------------------------------------------------|---------------------------|
| GSP1                      | F: AGCGGTTTCATCAAATGGTAC                                                                     | 3' RACE                   |
| GSP2                      | F: TATACAACCTACAGACACACGTG                                                                   | 3' RACE                   |
| 3' UTR-S                  | F: CCGCTCGAGGGTGAAAAATCCCTAAT<br>R: TTGCGGCCGCGCTTTGTAACAATATTTAAT                           | Construction of vector    |
| 3' UTR-L                  | F: CCGCTCGAGGGTGAAAAATCCCTAAT<br>R: ATAAGAATGCGGCCGCTACATTTCAAATATAT                         |                           |
| CXCL14-CDS                | F: CGACAAGCTTATGCGCATGAGGCTCCTGACCGC<br>R: TAGGGATTTTTCACCCTATTCTTCGTAGACCCTGCG              |                           |
| CXCL14-S                  | F: GTCTACGAAGAATAGGGTGAAAAATCCCTAATGGGAAAACCT<br>R: TGTCTGGATCCCCGCGCTTTGTAACAATATTTAATTTGTG |                           |
| CXCL14-L                  | F: GTCTACGAAGAATAGGGTGAAAAATCCCTAATGGGAAAACCT<br>R: TGTCTGGATCCCCGCACATTTCAAATATATTTTATTACTT |                           |
| 3' UTR-LM or<br>CXCL14-LM | F: CACAGGCATAAGACACAAT <u>TCCAAA</u> TATTG<br>R: CAATATTTGGATTGTGTCTTATGCCTGTG               | site-specific mutagenesis |
| 3' UTR-L-Mut17            | F: CAAATACACCCTTACCGAGGGTCAGTTTTTACATTT<br>R: CGGTAAGGGTGTATTTGTAACAATATTTAATTTGTGTCTTATGC   |                           |
| 3' UTR-L-Mut 150          | F: GGACCAAACCAATCTTCTCTCTAACATGAGCATTTGTG<br>R: GAAGATTGGTTTGGTCCTTAAGGACCATCTATCTGCTTC      |                           |
| 3' UTR-L-Mut217           | F: GGAATCCATCACACTAAAGCAATCTCTCTGTGATTCTCG<br>R: TTAGTGTGATGGATTCCATTGTCGAGAGGGAAAG          |                           |

Note: (1) Except for the 3' RACE primer, the other primer names represent the forward and reverse primers used in the construction of these recombinants. (2) The underline in the primer pairs for the construction of the 3' UTR-LM vector indicates the mutation of the "ATTAAA" sequence of PAS1 to "TCCAAA". (3) The underline in the primer pairs for the construction of the 3' UTR-L-Mut17, 3' UTR-L-Mut 150, and 3' UTR-L-Mut217 vector indicates the mutation in the corresponding sequence of binding sites in the seed region of miRNAs.
